# Supplementary material for: Breast Milk Iodine Concentration (BMIC) as a Biomarker of Iodine Status in Lactating Women and Children <2 Years of Age: A Systematic Review
Source: MDPI journal article supplement (doi:10.3390/nu14091691), 2022-04-19
Supplement: s1 [file s1]

**Supplementary Table S1. The Jadad scale for assessment of study quality for intervention studies (Jadad et al., 1996)**

| Item | Description                                                 | Yes     | No       |
|------|-------------------------------------------------------------|---------|----------|
| 1    | Was the study randomised?                                   | Score 1 | Score 0  |
| 2    | Was the method of randomisation described, and appropriate? | Score 1 | Score -1 |
| 3    | Was the study performed double-blind?                       | Score 1 | Score 0  |
| 4    | Was the method of blinding described and appropriate?       | Score 1 | Score -1 |
| 5    | Were withdrawals and drop outs of subjects described?       | Score 1 | Score 0  |
|      | Total                                                       |         |          |

**Supplementary Table S2. The Jadad scores of included studies**

| Reference | Described<br>as<br>randomised?<br>(+1) | Randomization<br>described and<br>appropriate? (-<br>1, +1) | Described<br>as double<br>blind?<br>(+1) | Double<br>blinding<br>described<br>and<br>appropriate?<br>(-1, +1) | Number<br>and reasons<br>for<br>withdrawals<br>described?<br>(+1) | Total<br>Jadad<br>score<br>(max 5) |
|-----------|----------------------------------------|-------------------------------------------------------------|------------------------------------------|--------------------------------------------------------------------|-------------------------------------------------------------------|------------------------------------|
|-----------|----------------------------------------|-------------------------------------------------------------|------------------------------------------|--------------------------------------------------------------------|-------------------------------------------------------------------|------------------------------------|

**Supplementary Table S3. Assessment of quality for a cohort study; adapted from the Newcastle-Ottawa scale. Stars were awarded if the criteria shown in italics were met. The number of stars awarded are indicated at the end of each statement. Maximum of 13 stars\*.**

---

### **Selection**

---

#### 1) Representativeness of the exposed cohort (max 2 stars\*)

- a) truly representative of offspring (infant/children) born to mothers in developed and developing countries \*\**
- b) somewhat representative of offspring (infant/children) born to mothers in developed and developing countries \**
- c) selected group of offspring, for example only certain socioeconomic groups/areas
- d) no description of the derivation of the cohort

#### 2) Ascertainment of exposure (max 2 stars\*)

- a) measurement by a trained health professional/researcher \*\**
- b) structured interview \**
- c) written self report (questionnaire etc.)
- d) other/no description

#### 3) Demonstration that outcome of interest was not present at start of study (max 1 star\*)

- a) yes \**
- b) no

### **Comparability**

#### 1) Comparability of cohorts on the basis of the design or analysis (max 4 stars\*)

- a) study states that physical factors have been controlled for in statistical analysis (all of the following: age and sex) \**
- b) study states that maternal factors have been controlled for in statistical analysis (all of the following: breast milk concentrations, age at delivery, parity, weight, height) \**
- c) study states that socioeconomic status has been controlled for in statistical analysis (both education and income) \**
- d) study states that lifestyle factors have been controlled for in statistical analysis (all of the following: smoking, alcohol) \**

### **Assessment**

#### 1) Assessment of outcome (max 1 star\*)

- a) independent assessment by trained health professional/researcher \**
- b) record linkage
- c) self report
- d) no description

#### 2) Was the lactation follow-up period or the child aged $\leq 2$ years (max 1 star\*)

- a) yes\**
- b) no

#### 3) Adequacy of follow up of cohorts (max 2 stars\*)

- a) complete follow up - all subjects accounted for \*\**
- b) subjects lost to follow up unlikely to introduce bias: number lost  $\leq 20$  %, or description provided of those lost suggesting no difference from those followed up \**
- c) follow up rate  $< 80\%$  and no description of those lost

d) no statement

---
